# Supplementary material
Source: PubMed Central journal article supplement (PMC3720797)

Haasken et al.

**Macrophage scavenger receptor 1 (Msr1, SR-A) influences B cell autoimmunity by regulating soluble autoantigen concentration**

**Supplemental Figure 1: Decreased incidence and severity of arthritis and endocarditis in *Msr1*<sup>-/-</sup> K/BxN mice.** (A) Histological analysis of ankle (left panels) and mitral valve (right panels) pathology in *Msr1*<sup>+/+</sup>, *+/-*, and *-/-* K/BxN mice demonstrates protection from both joint and cardiac valve pathology in non-arthritic *Msr1*<sup>-/-</sup> K/BxN mice. For ankles, original magnification = 10x, bar (in fourth row) indicates 200 microns. For mitral valves, original magnification = 40x; bar (in fourth row) indicates 100 microns. (B) Five non-arthritic *Msr1*<sup>-/-</sup> K/BxN mice (filled circles) were aged up to 15 weeks, during which any mild arthritis resolved or remained equivalent to the 8-week time point, as demonstrated by changes in ankle thickness. The data from the *Msr1*<sup>+/+</sup> K/BxN mice (reproduced from Figure 1B) are shown for comparison. Plotted values are means  $\pm$  SEM. \* $p \leq 0.05$ , \*\* $p \leq 0.01$ .

**Supplemental Figure 2: *Msr1*-sufficient host environment permits *Msr1*-deficient K/BxN hematopoietic compartment to drive arthritis and B cell activation**

*Rag1*<sup>-/-</sup> recipient mice were sublethally irradiated (300 Rad) and transplanted with  $10 \times 10^6$  bone marrow cells from *Msr1*<sup>+/+</sup> K/BxN mice or *Msr1*<sup>-/-</sup> K/BxN mice as indicated. (A) The development of arthritis in both groups was determined by weekly arthritis scoring and ankle measurements. Values shown are means  $\pm$  SEM.  $n = 3$  mice/group. (B) B cells in the reconstituted mice were analyzed for their ability to bind to GPI-tetramer, for having undergone isotype switching express IgG1 intracellularly, and transitioning to a CD38<sup>low</sup> GL7<sup>+</sup> activated

phenotype. Numbers indicate the percentage of cells in each quadrant or gate. **(C)**

Representative flow cytometric plot of CD3<sup>-</sup> F4/80<sup>+</sup> macrophages in the reconstituted mice analyzed for expression of the congenic markers differentiating the donor cells (CD45.1<sup>+</sup> CD45.2<sup>+</sup>) from the host cells (CD45.1<sup>-</sup> CD45.2<sup>+</sup>). The numbers shown are percentages. In analysis of multiple mice, the percent of macrophages that were host-derived ranged from 38-63%. **(D)** Similar analysis for CD3<sup>+</sup> T cells and B220<sup>+</sup> B cells reveals that they are entirely donor-derived.

Haasken et al.  
Supplemental Figure 1

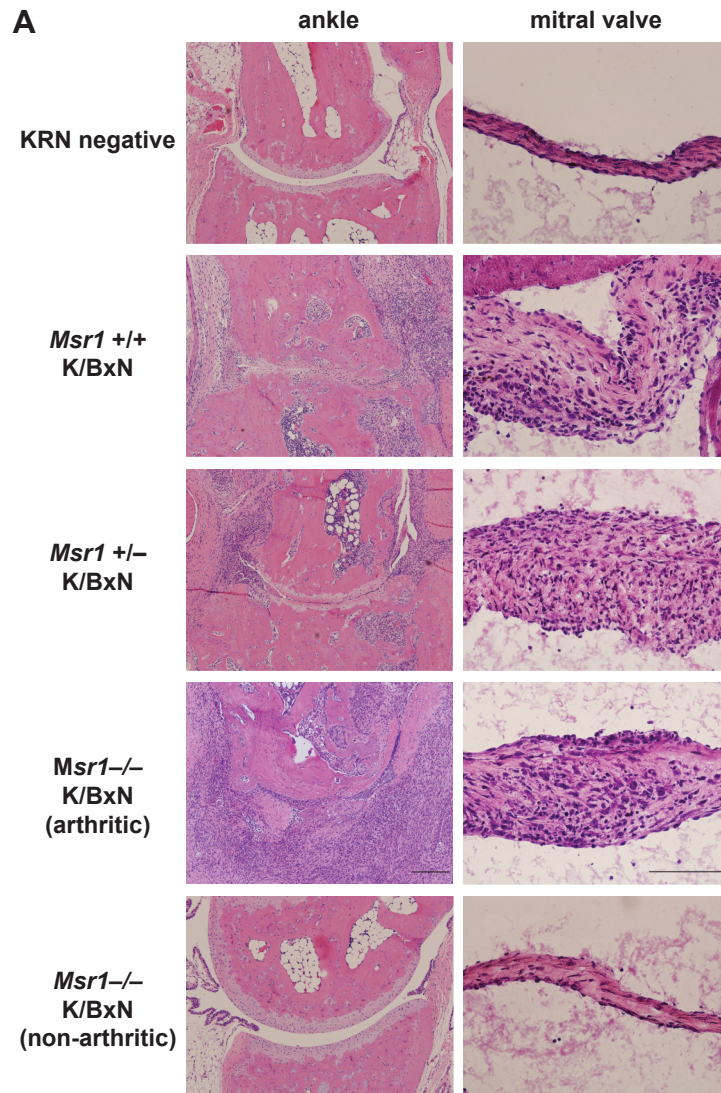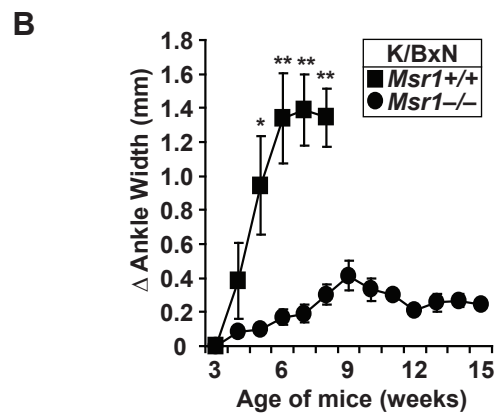

Haasken et al.  
Supplemental Figure 2

A

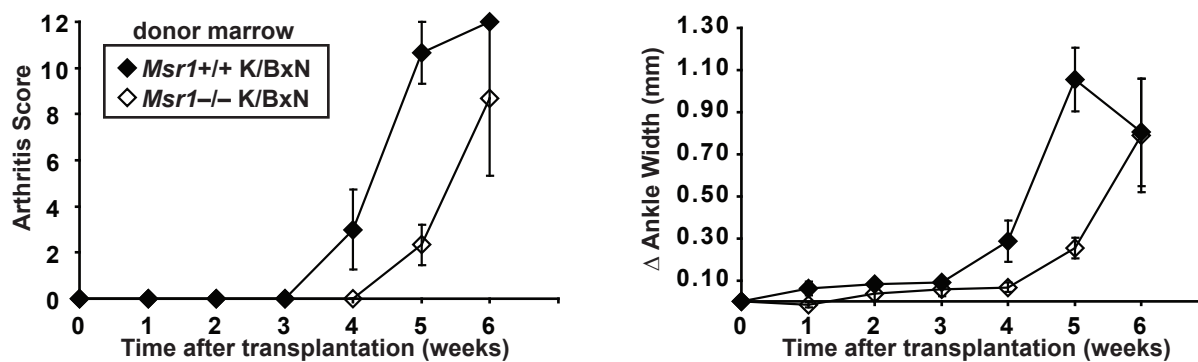

B

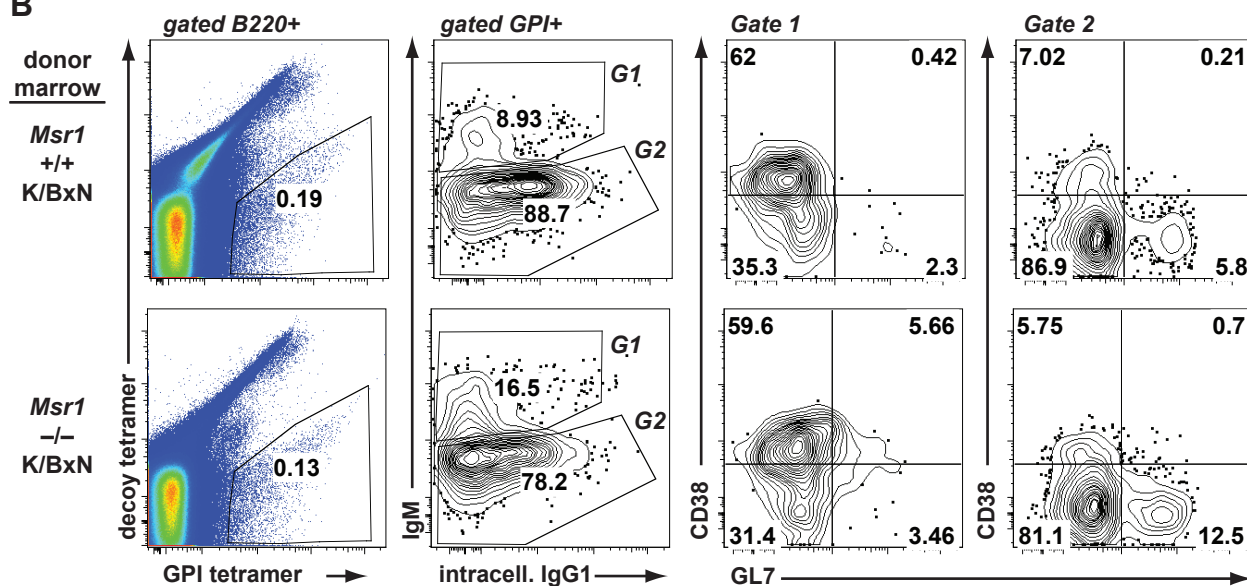

C

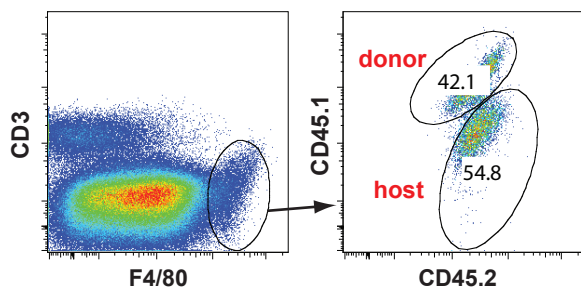

D

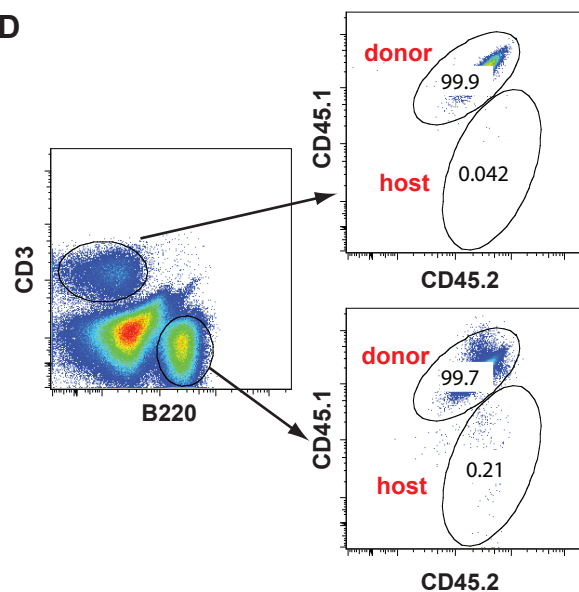

Supplement: NIHMS485630-supplement-1.pdf [file NIHMS485630-supplement-1.pdf]
